# Supplementary material
Source: PubMed Central journal article supplement (PMC8192590)
Supplement: NIHMS1671484-supplement-2.pdf [file NIHMS1671484-supplement-2.pdf]

**Table S1.** Coefficients for stepwise linear regression models with their respective *P* values, and BIC increase values for each parameter removed from the model.

**Base model**

|             | <b>Coefficient</b> | <b>P value</b> | <b>BIC Increase</b> |
|-------------|--------------------|----------------|---------------------|
| (Intercept) | 1.67               | 1.25E-38       | -                   |
| age         | 0.07               | 3.56E-04       | 4.46                |
| MD          | -0.08              | 3.35E-26       | 104.00              |
| PSD         | 0.27               | 7.65E-75       | 327.28              |
| GHT         | 0.62               | 5.37E-15       | 52.91               |
| FNR         | 4.78               | 4.99E-29       | 116.94              |

**Base + TD model**

|             | <b>Coefficient</b> | <b>P value</b> | <b>BIC Increase</b> |
|-------------|--------------------|----------------|---------------------|
| (Intercept) | 1.58               | 4.71E-39       | -                   |
| age         | 0.06               | 2.09E-03       | 1.21                |
| PSD         | 0.31               | 4.13E-101      | 449.50              |
| GHT         | 0.37               | 1.02E-06       | 15.70               |
| FPR         | 2.50               | 8.32E-04       | 2.92                |
| FNR         | 3.08               | 3.98E-14       | 49.14               |
| TD2         | -0.03              | 1.49E-09       | 28.40               |
| TD18        | -0.04              | 1.43E-15       | 55.71               |
| TD19        | -0.02              | 1.97E-05       | 10.00               |
| TD21        | 0.03               | 3.22E-05       | 9.06                |
| TD22        | 0.03               | 1.48E-04       | 6.15                |
| TD28        | -0.01              | 3.58E-03       | 0.22                |
| TD31        | 0.02               | 5.41E-06       | 12.48               |
| TD34        | -0.03              | 5.62E-07       | 16.85               |
| TD44        | -0.03              | 4.97E-05       | 8.23                |
| TD48        | 0.03               | 1.37E-06       | 15.13               |
| TD50        | -0.04              | 9.64E-07       | 15.80               |
| TD52        | -0.03              | 2.64E-05       | 9.44                |

**Base + AT model**

|             | <b>Coefficient</b> | <b>P value</b> | <b>BIC Increase</b> |
|-------------|--------------------|----------------|---------------------|
| (Intercept) | 2.96               | 6.41E-39       | -                   |
| age         | 0.05               | 3.59E-03       | 0.21                |
| MD          | 0.12               | 2.72E-10       | 31.71               |
| PSD         | 0.34               | 3.18E-90       | 398.85              |
| FPR         | 3.18               | 2.36E-05       | 9.63                |
| FNR         | 2.45               | 7.25E-09       | 25.28               |
| AT1         | -2.61              | 6.33E-25       | 98.38               |
| AT2         | 1.90               | 2.23E-14       | 50.23               |
| AT6         | 5.49               | 3.40E-18       | 67.61               |
| AT7         | 2.19               | 1.68E-06       | 14.71               |
| AT9         | 4.13               | 1.69E-19       | 73.57               |
| AT11        | 6.39               | 4.01E-50       | 214.11              |
| AT12        | 4.46               | 7.72E-20       | 75.12               |
| AT14        | -1.46              | 8.95E-05       | 7.10                |
