# Supplementary material
Source: PubMed Central journal article supplement (PMC8192590)
Supplement: NIHMS1671484-supplement-3.pdf [file NIHMS1671484-supplement-3.pdf]

**Table S2.** Adjusted  $R^2$  with 95% confidence intervals (CIs) and BIC for models selected from visual field features of the retest test.

|                                           | <b>Adjusted <math>R^2</math></b> | <b>95% Cis</b> |      | <b>Absolute BIC</b> |
|-------------------------------------------|----------------------------------|----------------|------|---------------------|
| <b>Base model</b>                         | 0.29                             | 0.26           | 0.32 | 17712.5             |
| <b>Base + TD model</b>                    | 0.33                             | 0.30           | 0.36 | 17544.2             |
| <b>Base + AT model</b>                    | 0.32                             | 0.29           | 0.35 | 17559.5             |
|                                           | <b><math>\Delta</math>BIC</b>    |                |      |                     |
| <b><math>BIC_{TD} - BIC_{base}</math></b> | -168.3                           |                |      |                     |
| <b><math>BIC_{AT} - BIC_{base}</math></b> | -153.0                           |                |      |                     |
| <b><math>BIC_{AT} - BIC_{TD}</math></b>   | 15.3                             |                |      |                     |
