# Supplementary material
Source: PubMed Central journal article supplement (PMC8192590)
Supplement: NIHMS1671484-supplement-4.pdf [file NIHMS1671484-supplement-4.pdf]

**Table S3.** Summary of visual field (VF) features affecting test-retest variability, in order of decreasing influence.

| <b>VF features associated with increased test-retest variability</b> | <b>VF features associated with decreased test-retest variability</b> |
|----------------------------------------------------------------------|----------------------------------------------------------------------|
| Pattern standard deviation                                           | AT1 (normal VF)                                                      |
| AT11 (concentric peripheral defect)                                  | AT14 (superior paracentral defect)                                   |
| AT12 (temporal hemianopia)                                           |                                                                      |
| AT9 (inferotemporal defect)                                          |                                                                      |
| AT6 (near total loss)                                                |                                                                      |
| AT2 (superior peripheral defect)                                     |                                                                      |
| Mean deviation                                                       |                                                                      |
| False negative rate                                                  |                                                                      |
| AT7 (central scotoma)                                                |                                                                      |
| False positive rate                                                  |                                                                      |
| Age                                                                  |                                                                      |

AT = Archetype
